# Supplementary material
Source: PubMed Central journal article supplement (PMC5736418)
Supplement: NIHMS915158-supplement.pdf [file NIHMS915158-supplement.pdf]

**Appendix Table 1.** Logistic Regression of the Association Between Women’s Characteristics and HPV Vaccine Initiation, and by Foreign-birth

| Variable                              | Initiated HPV vaccination<br>Unadjusted OR (95% CI) |                          |
|---------------------------------------|-----------------------------------------------------|--------------------------|
|                                       | Overall                                             | Foreign-born             |
| <b>Age</b>                            |                                                     |                          |
| 18–26 years                           | <b>6.56 (5.71, 7.53)</b>                            | <b>0.38 (0.30, 0.48)</b> |
| 27–30 years                           | <b>2.88 (2.47, 3.35)</b>                            | <b>0.53 (0.42, 0.67)</b> |
| 31–36 years                           | ref                                                 | <b>0.46 (0.34, 0.64)</b> |
| <b>Education level</b>                |                                                     |                          |
| No high school degree                 | ref                                                 | <b>0.15 (0.10, 0.24)</b> |
| High school degree                    | <b>1.43 (1.18, 1.72)</b>                            | <b>0.43 (0.29, 0.63)</b> |
| Some college                          | <b>2.50 (2.10, 2.98)</b>                            | <b>0.50 (0.37, 0.67)</b> |
| Associate/college degree or higher    | <b>2.01 (1.70, 2.38)</b>                            | <b>0.48 (0.39, 0.59)</b> |
| <b>Household income</b>               |                                                     |                          |
| 0–100% FPL                            | ref                                                 | <b>0.32 (0.24, 0.43)</b> |
| <100%–200% FPL                        | <b>0.72 (0.61, 0.84)</b>                            | <b>0.40 (0.30, 0.54)</b> |
| <200%–300% FPL                        | 0.92 (0.76, 1.10)                                   | <b>0.48 (0.34, 0.67)</b> |
| >300% FPL                             | 0.99 (0.84, 1.17)                                   | <b>0.40 (0.31, 0.51)</b> |
| <b>Race/Ethnicity</b>                 |                                                     |                          |
| Non-Hispanic white                    | ref                                                 | <b>0.64 (0.45, 0.91)</b> |
| Hispanic                              | <b>0.64 (0.57, 0.72)</b>                            | <b>0.31 (0.25, 0.38)</b> |
| Black                                 | <b>0.82 (0.72, 0.94)</b>                            | <b>0.58 (0.39, 0.87)</b> |
| Asian                                 | <b>0.62 (0.52, 0.75)</b>                            | <b>0.23 (0.16, 0.33)</b> |
| <b>Marital status</b>                 |                                                     |                          |
| Married                               | ref                                                 | <b>0.39 (0.31, 0.48)</b> |
| Living with partner                   | <b>2.50 (2.21, 2.82)</b>                            | <b>0.48 (0.38, 0.61)</b> |
| Other (not married)                   | <b>2.08 (1.75, 2.47)</b>                            | <b>0.35 (0.24, 0.53)</b> |
| <b>Region</b>                         |                                                     |                          |
| Northeast                             | ref                                                 | <b>0.52 (0.37, 0.73)</b> |
| Midwest                               | 0.82 (0.67, 1.00)                                   | <b>0.37 (0.25, 0.55)</b> |
| South                                 | <b>0.63 (0.53, 0.74)</b>                            | <b>0.31 (0.25, 0.39)</b> |
| West                                  | <b>0.82 (0.69, 0.98)</b>                            | <b>0.35 (0.25, 0.49)</b> |
| <b>Usual source of care</b>           |                                                     |                          |
| No                                    | ref                                                 | <b>0.31 (0.23, 0.43)</b> |
| Clinic/Health center                  | <b>1.35 (1.16, 1.57)</b>                            | <b>0.32 (0.24, 0.42)</b> |
| Doctor’s office/HMO                   | <b>1.35 (1.18, 1.56)</b>                            | <b>0.48 (0.39, 0.60)</b> |
| Other                                 | <b>1.69 (1.27, 2.24)</b>                            | <b>0.43 (0.20, 0.94)</b> |
| <b>OB/GYN visit in past 12 months</b> |                                                     |                          |
| Yes                                   | <b>1.47 (1.34, 1.62)</b>                            | <b>0.38 (0.32, 0.46)</b> |
| No                                    | ref                                                 | <b>0.41 (0.33, 0.51)</b> |
| <b>Health insurance</b>               |                                                     |                          |
| Yes                                   | <b>2.26 (1.95, 2.61)</b>                            | <b>0.48 (0.39, 0.57)</b> |
| No                                    | ref                                                 | <b>0.29 (0.21, 0.39)</b> |
| <b>Self-rated health status</b>       |                                                     |                          |
| Excellent/Very good                   | <b>1.29 (1.06, 1.56)</b>                            | <b>0.36 (0.30, 0.44)</b> |

**Appendix**  
**HPV Vaccination Among Foreign-Born Women: Examining the National Health Interview Survey 2013–2015**  
**Cofie et al.**

|                                |                          |                          |
|--------------------------------|--------------------------|--------------------------|
| Good                           | 0.96 (0.77, 1.19)        | <b>0.45 (0.34, 0.60)</b> |
| Fair/Poor                      | ref                      | <b>0.40 (0.23, 0.70)</b> |
| Had Pap test in past 12 months |                          |                          |
| Yes                            | <b>1.37 (1.23, 1.54)</b> | <b>0.40 (0.33, 0.48)</b> |
| No                             | ref                      | <b>0.39 (0.31, 0.50)</b> |

*Note:* Boldface indicates statistical significance ( $p < 0.05$ ).

HPV, human papilloma virus; OB/GYN, obstetrics and gynecology visit; FPL, federal poverty level
